# Supplementary material for: CD200R signaling inhibits pro-angiogenic gene expression by macrophages and suppresses choroidal neovascularization
Source: PubMed Central journal article supplement (PMC3812658; doi:10.1038/srep03072), 2013-10-30
Supplement: srep03072-s1.pdf [file srep03072-s1.pdf]

## Supplementary Figures

**Manuscript:**

**CD200R signaling inhibits pro-angiogenic gene expression by macrophages and suppresses choroidal neovascularization**

\*Shintaro Horie<sup>1,2</sup>, \*Scott J Robbie<sup>3</sup>, Jian Liu<sup>1</sup>, Wei-Kang Wu<sup>1</sup>, , Robin R Ali<sup>3</sup>, James W Bainbridge<sup>3</sup>, Lindsay B Nicholson<sup>1,4</sup>, Manabu Mochizuki<sup>2</sup>, \*\*Andrew D Dick<sup>1,4</sup> and \*David A Copland<sup>1</sup>

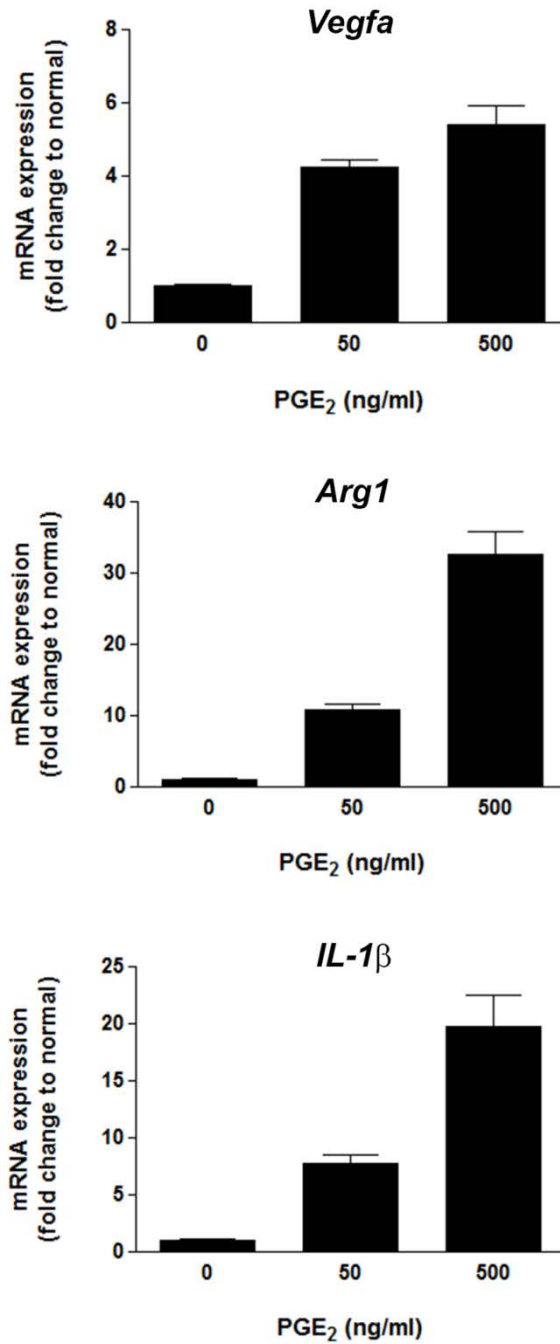

**Supplementary Figure 1: PGE<sub>2</sub> induces alternatively activated macrophages**

*Vegf*, *Arg1* and *Il1b* mRNA expression as determined by quantitative RT-qPCR from WT and macrophages stimulated with media alone, 50- or 500- ng/ml PGE<sub>2</sub> for 6 h. Messenger RNA level was normalized to 18srRNA. Data are presented as mean ± SEM, n=3.

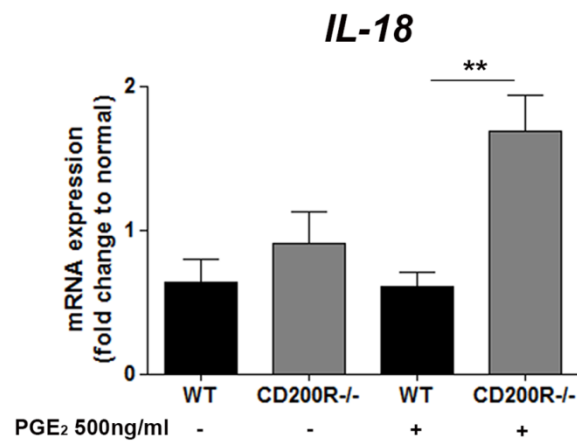

**Supplementary Figure 2: CD200R-deficient macrophages demonstrate increased IL-18 expression following PGE<sub>2</sub> stimulation**

*IL-18* mRNA expression, derived from WT and *CD200R*<sup>-/-</sup> macrophages stimulated by PGE<sub>2</sub> for 6 h, determined by quantitative RT-PCR. Messenger RNA level was normalized to 18srRNA. Data are presented as mean ± SEM, n=3. \*\*P<0.005 between two groups.

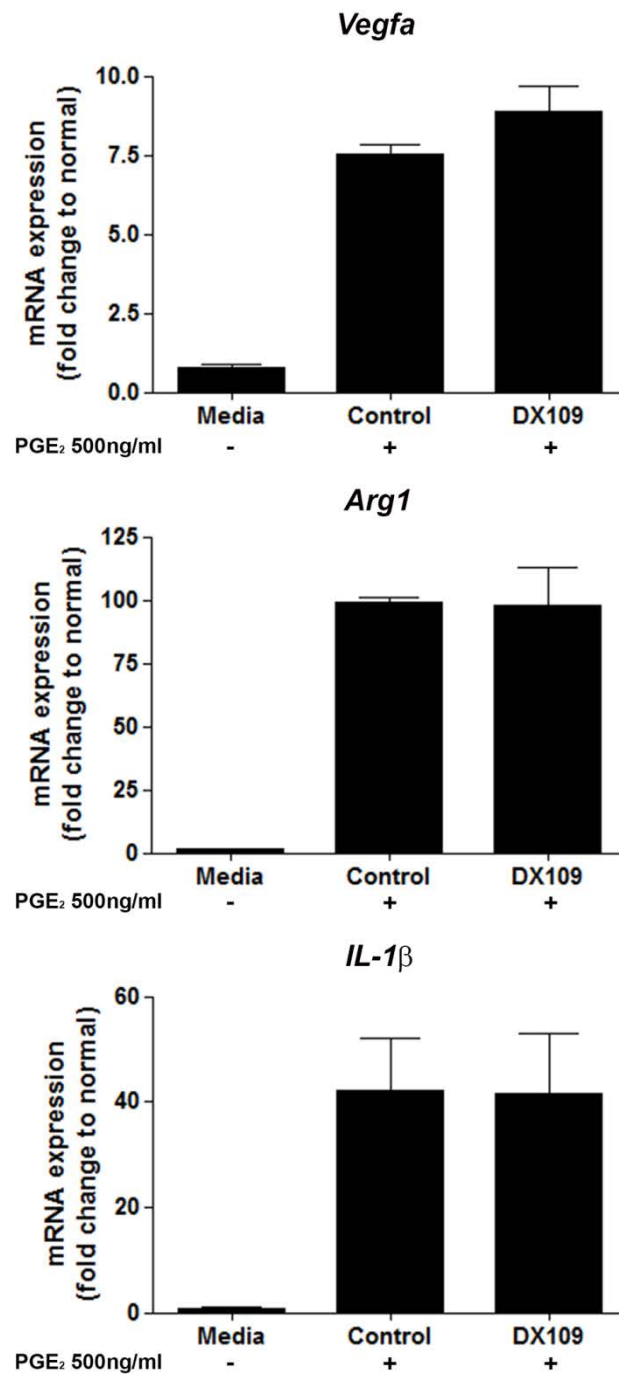

**Supplementary Figure 3: Promoting CD200R signaling does not suppresses PGE<sub>2</sub>-induced pro-angiogenic gene expression profile of macrophages**

BMM $\Phi$  were pre-incubated for 2 hours with or without 10  $\mu$ g/ml DX109 before stimulation with 500 ng/ml PGE<sub>2</sub> for 6 hr. RNA was extracted for RT-qPCR analysis to determine *Vegfa*, *Arg-1* and *Il-1b* gene expression. *Gapdh* was used as a normalizing control. Data are presented as mean  $\pm$  SEM, n=3.

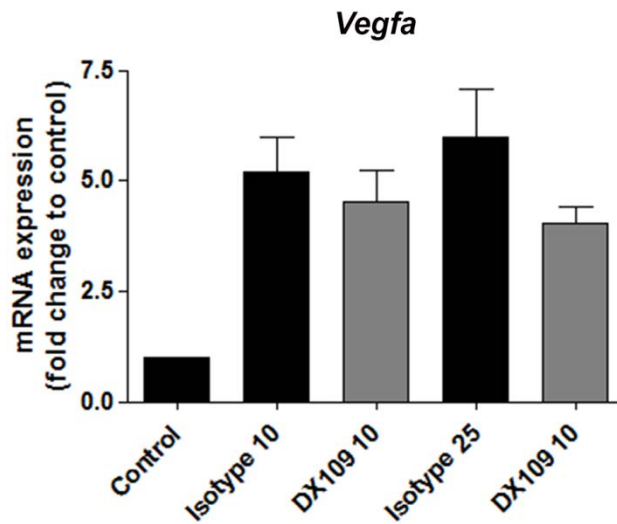

**Supplementary Figure 4: Promoting CD200R signaling does not suppress necrotic RPE-induced *vegfa* gene expression**

Using an adapted *in vitro* phagocytosis assay, necrotic RPE cells prepared from B6-RPE07 cells by heating at 95°C for 15 minutes, were added to BMM $\Phi$  that were pre-incubated for 2 hours with 10- or 25  $\mu$ g/ml DX109 or isotype control mAb. BMM $\Phi$  were washed and collected after 24 hr incubation with necrotic RPE, and RNA extracted for RT-qPCR analysis to determine *Vegfa* gene expression. *Gapdh* was used as a normalizing control. Data are presented as mean  $\pm$  SEM, n=3.

## C57BL/6J

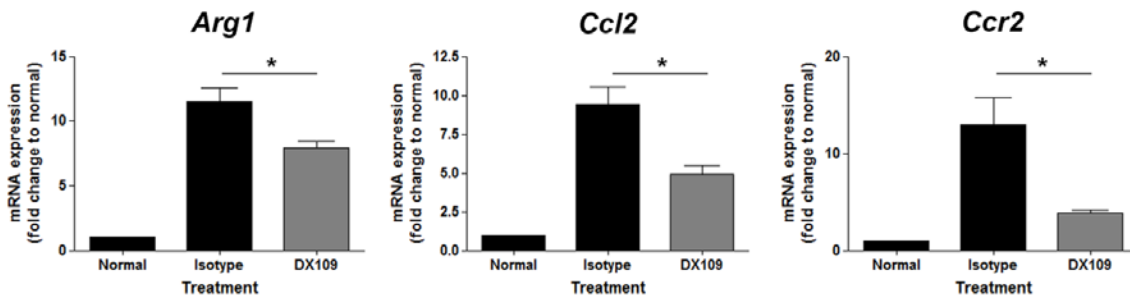

## CD200R<sup>-/-</sup>

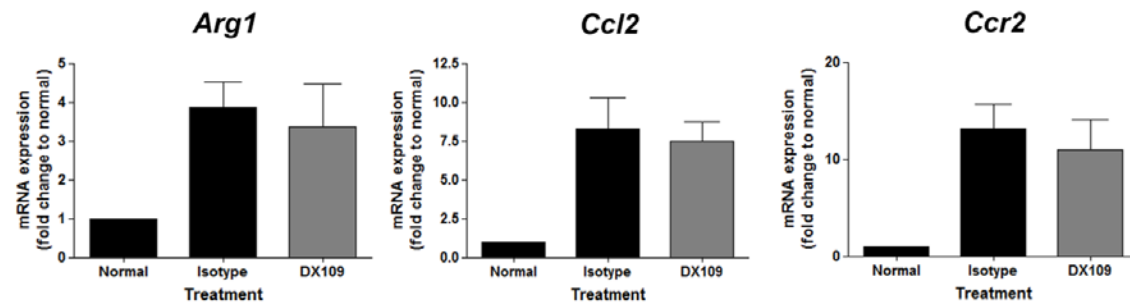

### Supplementary Figure 5: Reduction in proangiogenic gene expression is CD200R-specific

Intravitreal administration of DX109 or isotype control mAb was performed immediately following laser induction of CNV in C57BL/6J and CD200R<sup>-/-</sup> mice. RT-qPCR analysis for *Arg-1*, *Ccl2*, *Ccr2* and *Il-1b* gene expression in RPE/choroid tissue collected at day 3 post-laser and injection. *Gapdh* served as a normalizing control. Data are presented as mean  $\pm$  SEM, n=6 for each treatment group. \*p<0.05 isotype vs. DX109.
